# Supplementary material for: Synthesis, Photophysical Properties, and Toxicity of o-Xylene-Bridged Porphyrin Dimers
Source: MDPI journal article supplement (doi:10.3390/inorganics11100415), 2023-10-19
Supplement: s1 [file s1]

*Supporting information for*

**Synthesis, photophysical properties, and toxicity of o-xylene-bridged porphyrin dimers**

**Table of content**

|                                                                                               |         |
|-----------------------------------------------------------------------------------------------|---------|
| <b>1.</b> $^1\text{H}$ NMR, $^{13}\text{C}$ NMR, mass-spectra for compounds <b>6-10</b> ..... | S1-S15  |
| <b>2.</b> Concentration dependencies, solubilization study, singlet oxygen generation         | S16-S20 |
| <b>3.</b> SEM images                                                                          | S21     |
| <b>4.</b> Kinetic curves of photosensitized oxidation                                         | S22     |

$^1\text{H}$  NMR-,  $^{13}\text{C}$  NMR and mass-spectra of synthesized compounds **6-10** are illustrated below.

1. Compound **4**.

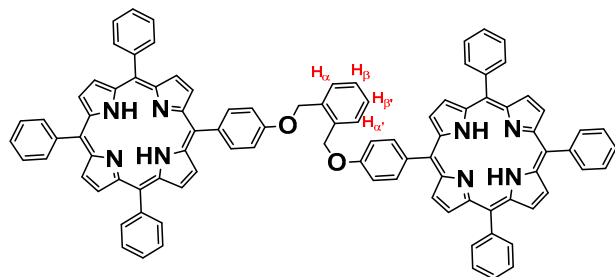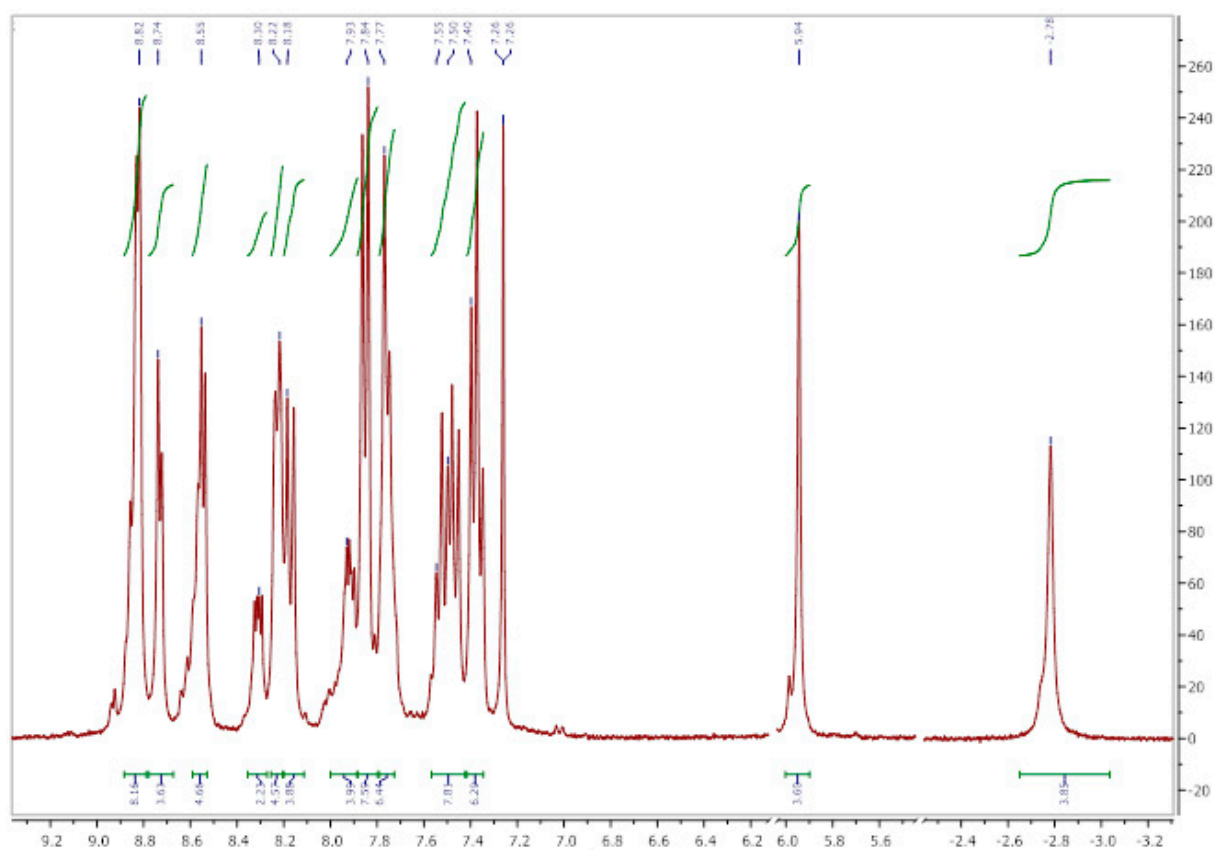

**Figure S1.**  $^1\text{H}$  NMR of compound **4** in  $\text{CDCl}_3$  at 298 K.

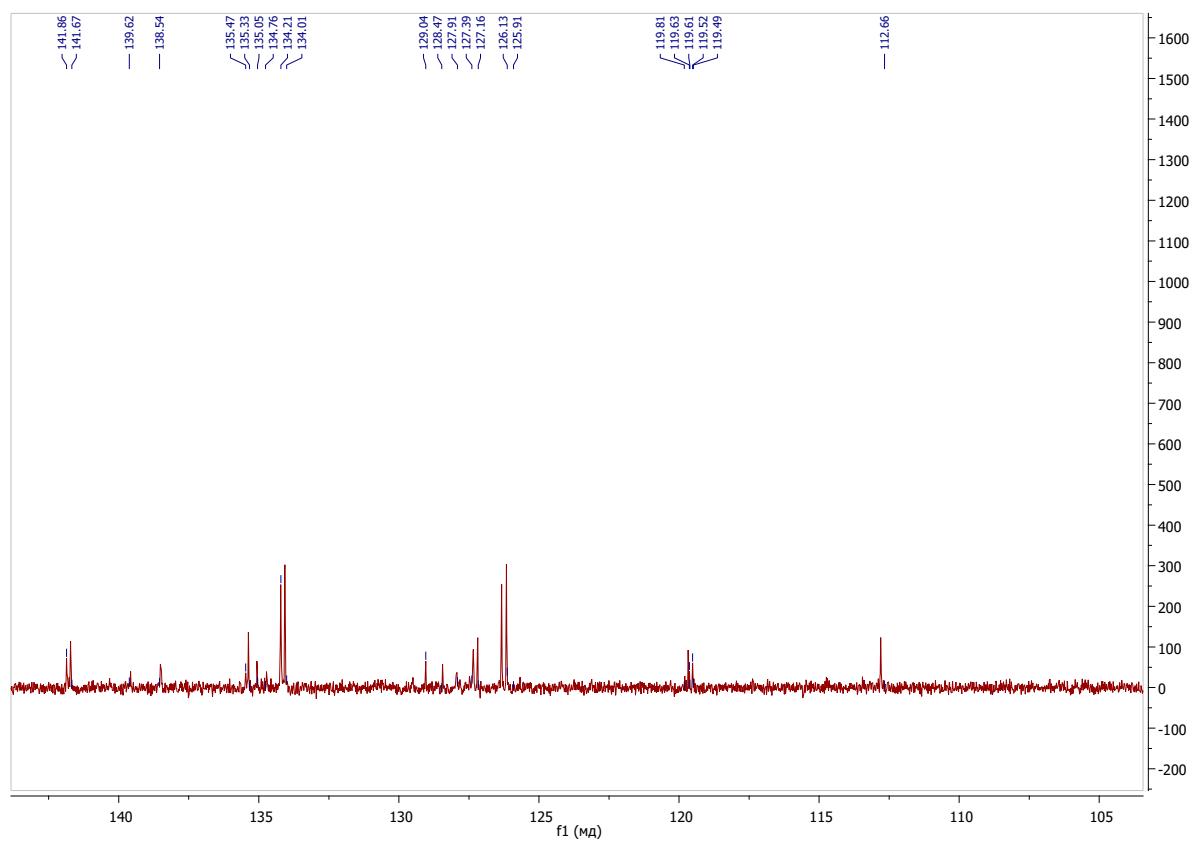

**Figure S2.** <sup>13</sup>C NMR of compound **4** in CDCl<sub>3</sub>.

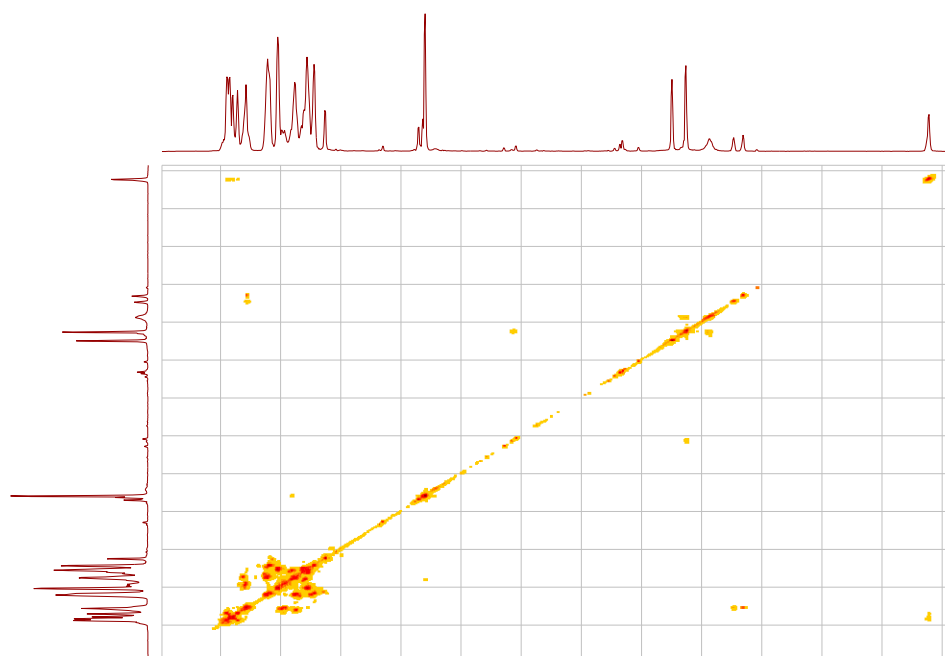

**Figure S3.**  $^1\text{H}$ - $^1\text{H}$  COSY NMR of compound **4** in  $\text{CDCl}_3$ .

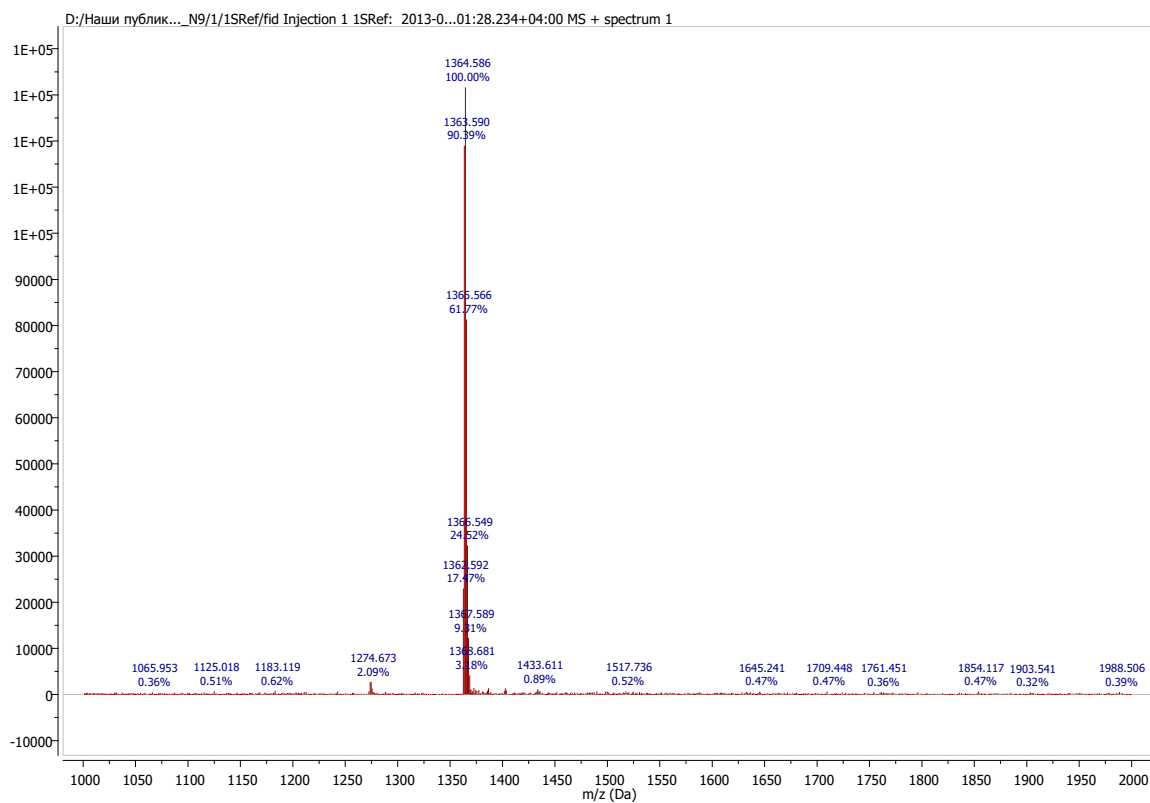

**Figure S4.** MALDI-TOF mass-spectrum of compound **4**.

## 2. Compound **5**.

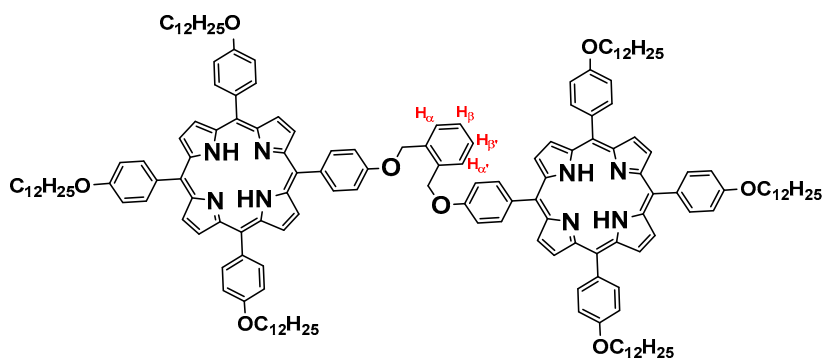

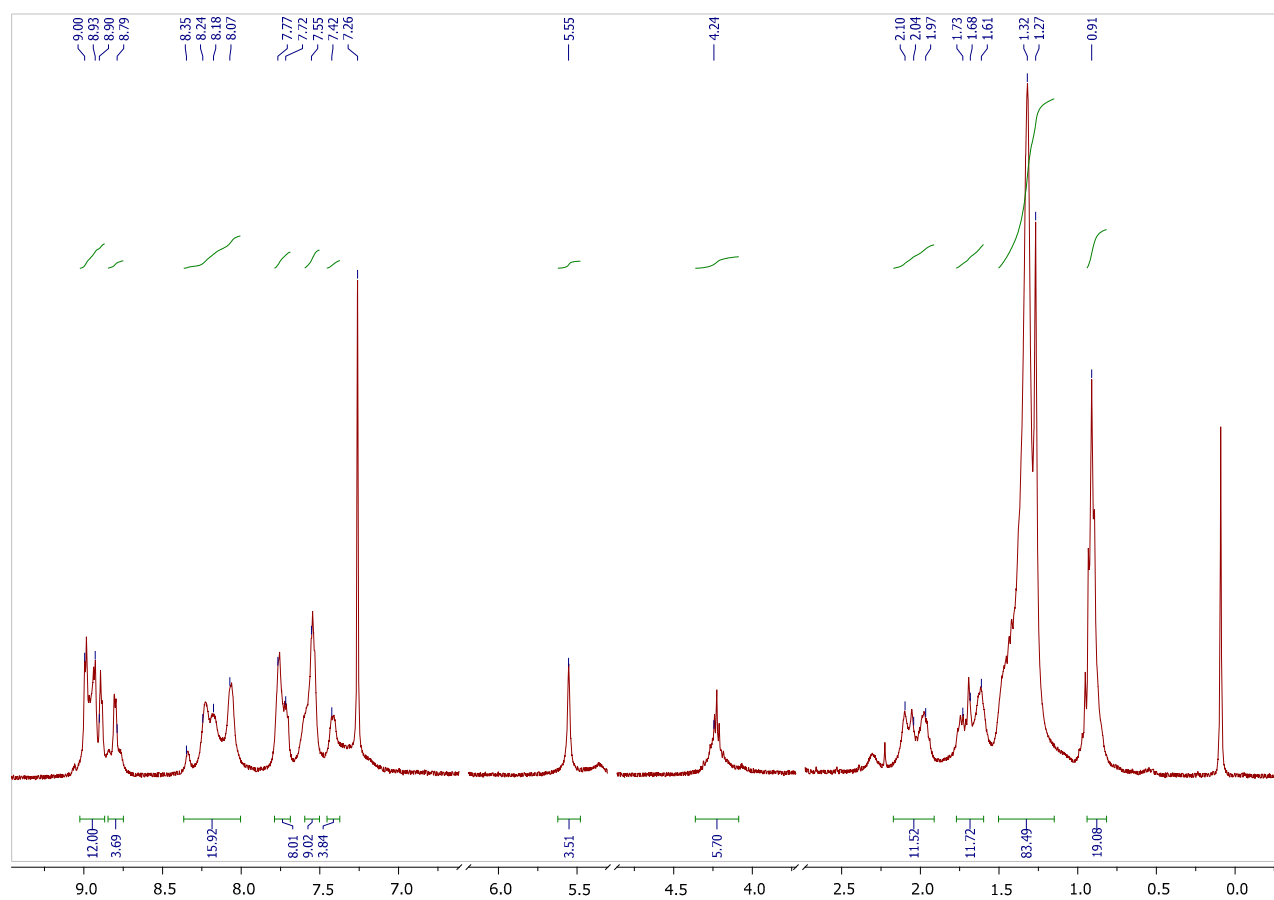

**Figure S5.** <sup>1</sup>H NMR of compound **5** in CDCl<sub>3</sub>.

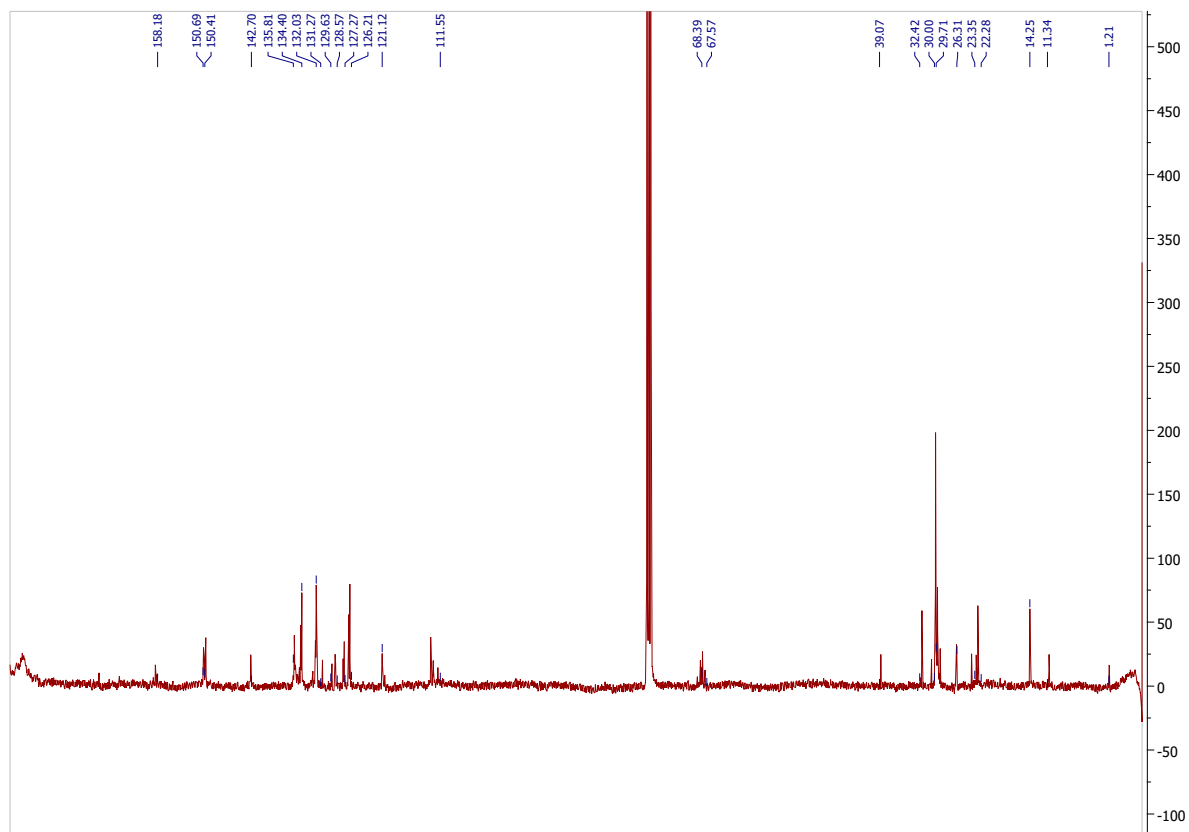

**Figure S6.** <sup>13</sup>C NMR of compound **5** in CDCl<sub>3</sub>.

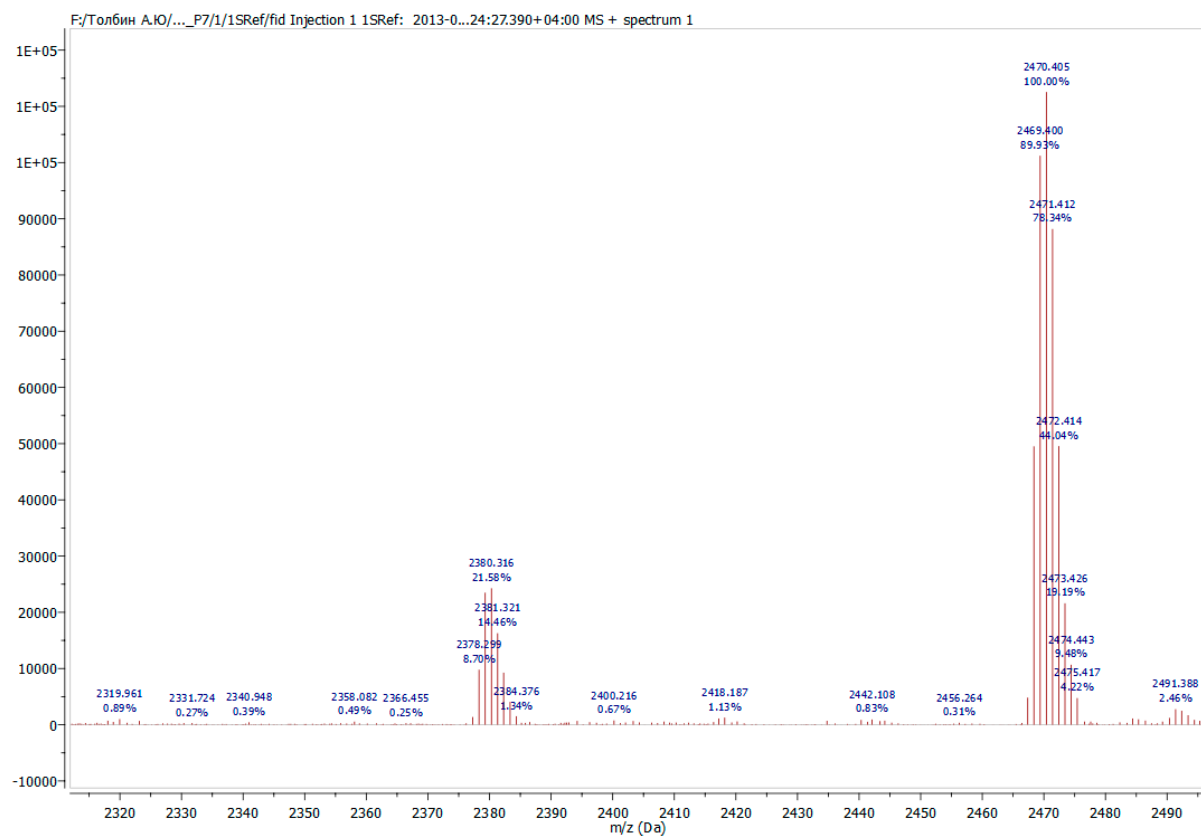

**Figure S7.** MALDI-TOF mass-spectrum of compound **5**.

### 3. Compound **4-Zn**.

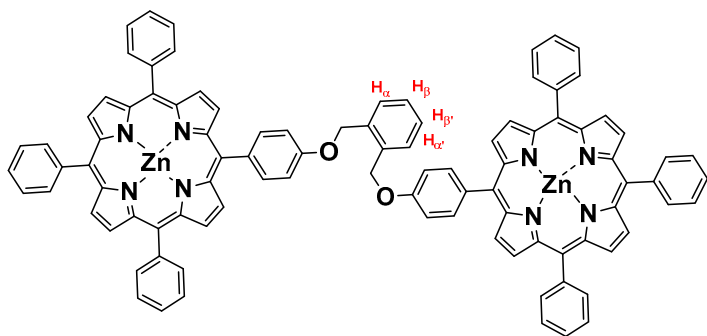

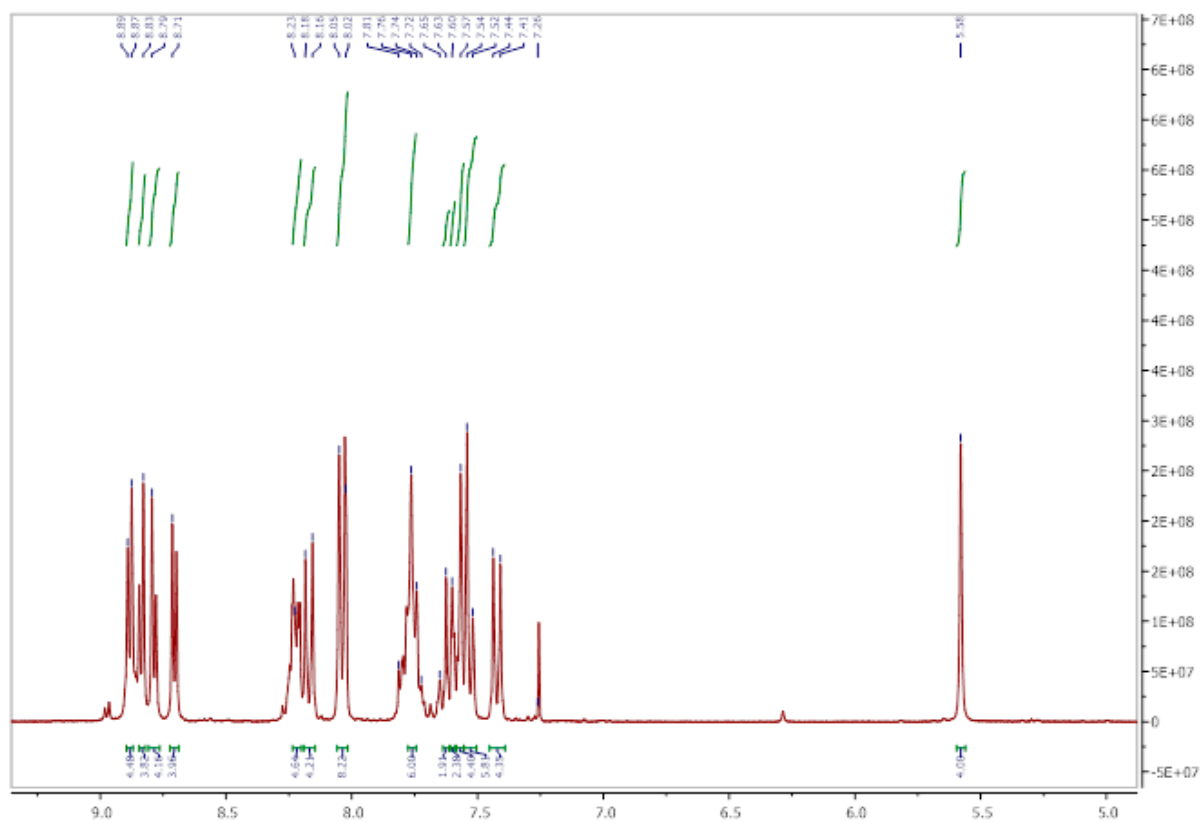

**Figure S8.**  $^1\text{H}$  NMR of compound 4-Zn in  $\text{CDCl}_3$ .



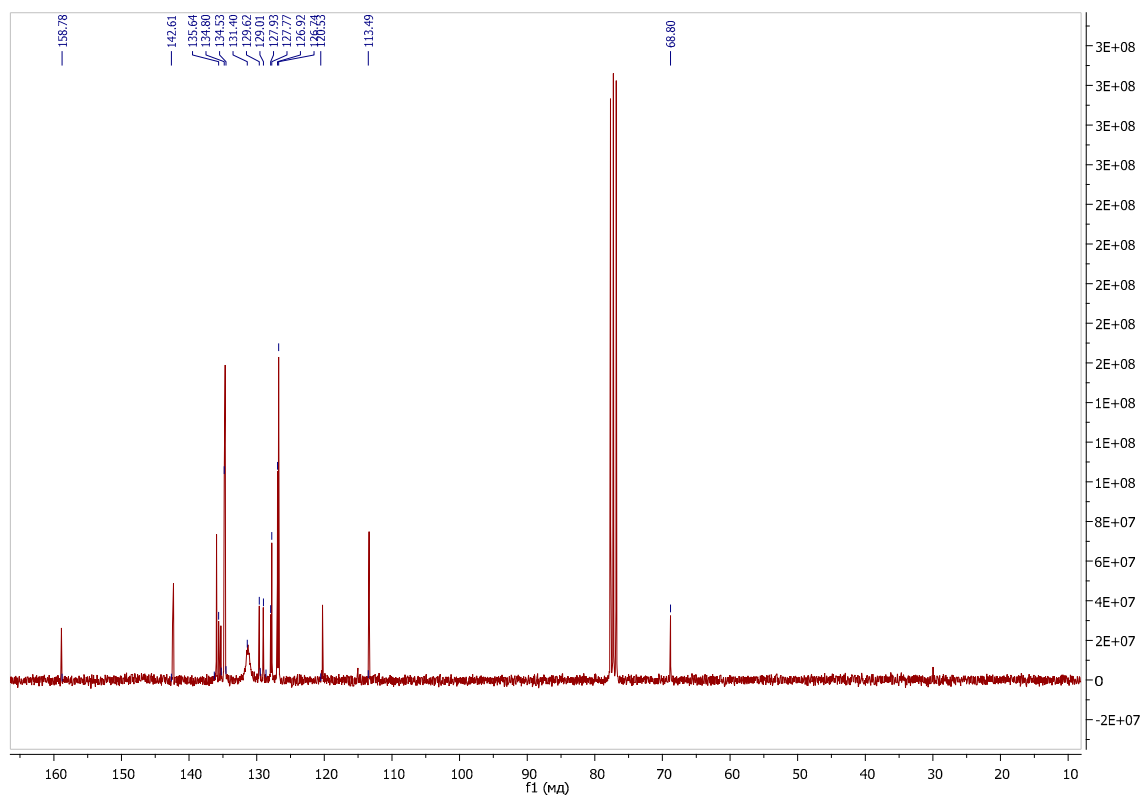

**Figure S9.**  $^{13}\text{C}$  NMR of compound **4-Zn** in  $\text{CDCl}_3$ .

Comment 1  
Comment 2

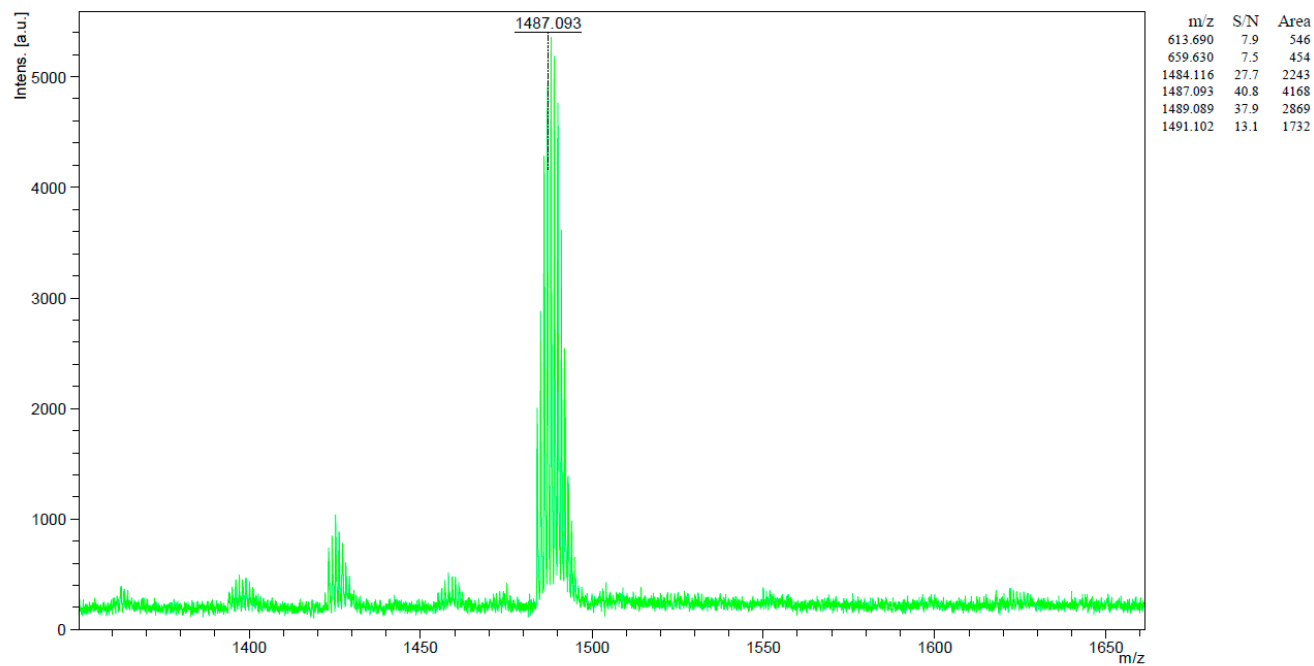

**Figure S10.** MALDI-TOF mass-spectrum of compound **4-Zn**.

4. Compound **5-Zn**.

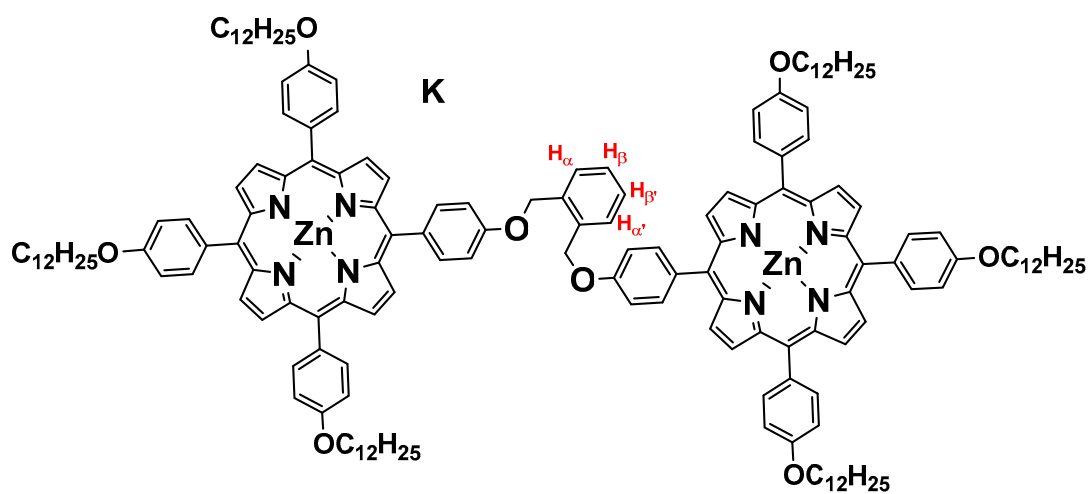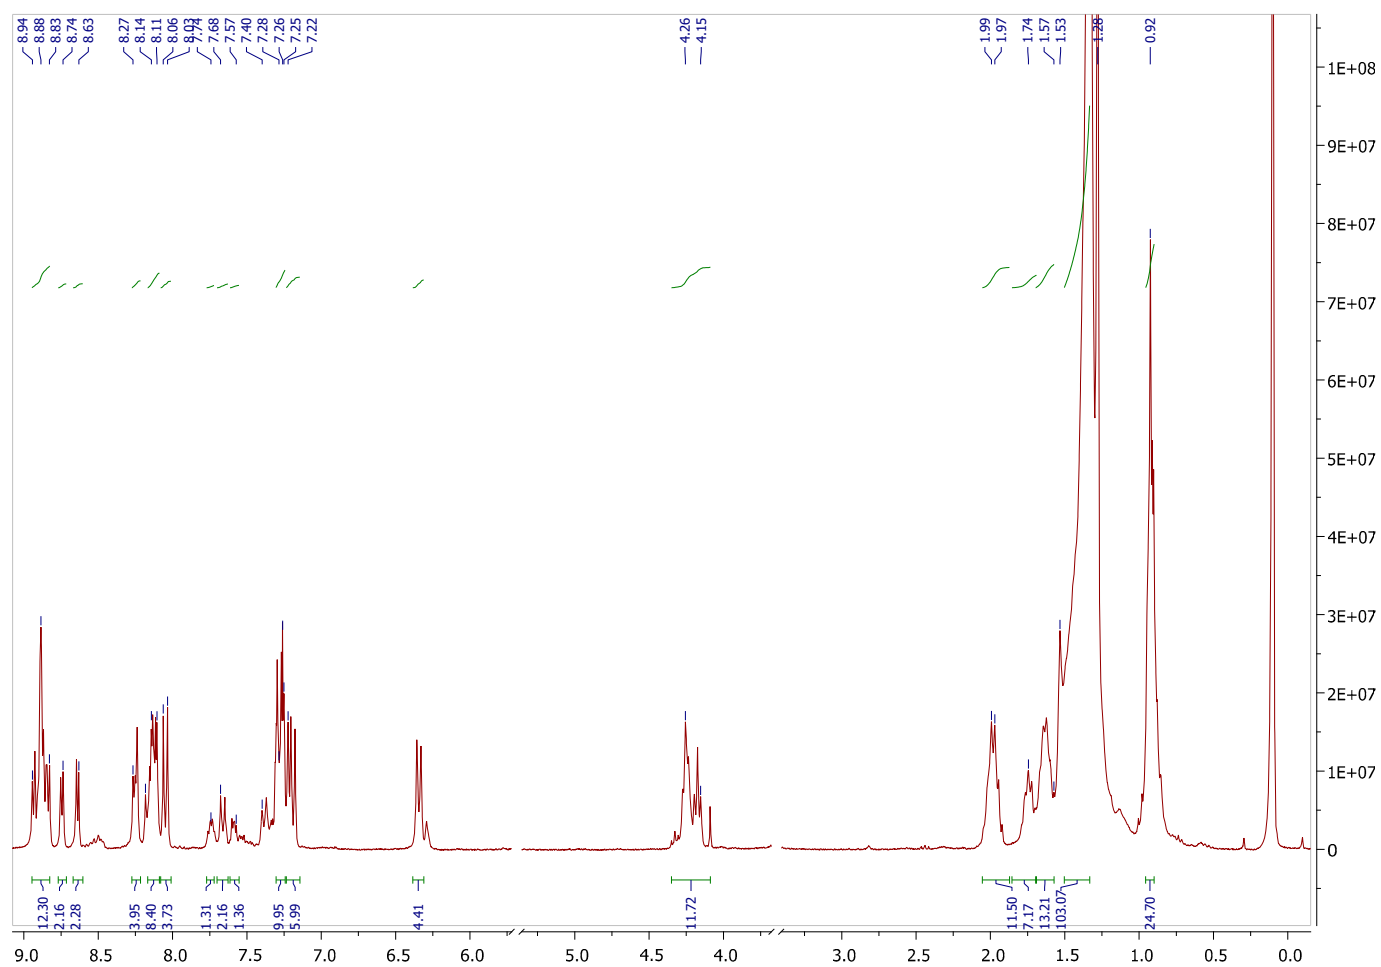

**Figure S11.**  $^1\text{H}$  NMR of compound **5-Zn** in  $\text{CDCl}_3$ .

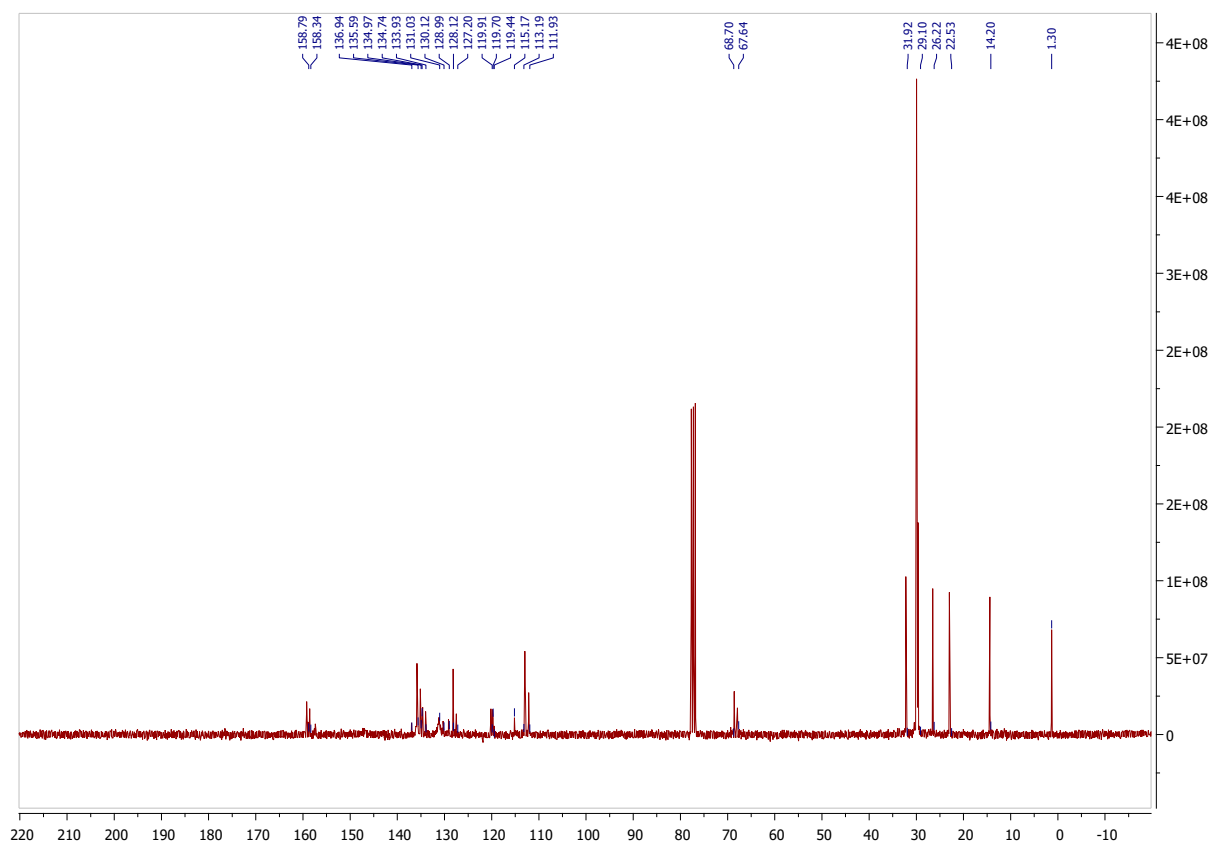

**Figure S12.**  $^{13}\text{C}$  NMR of compound **5-Zn** in  $\text{CDCl}_3$ .

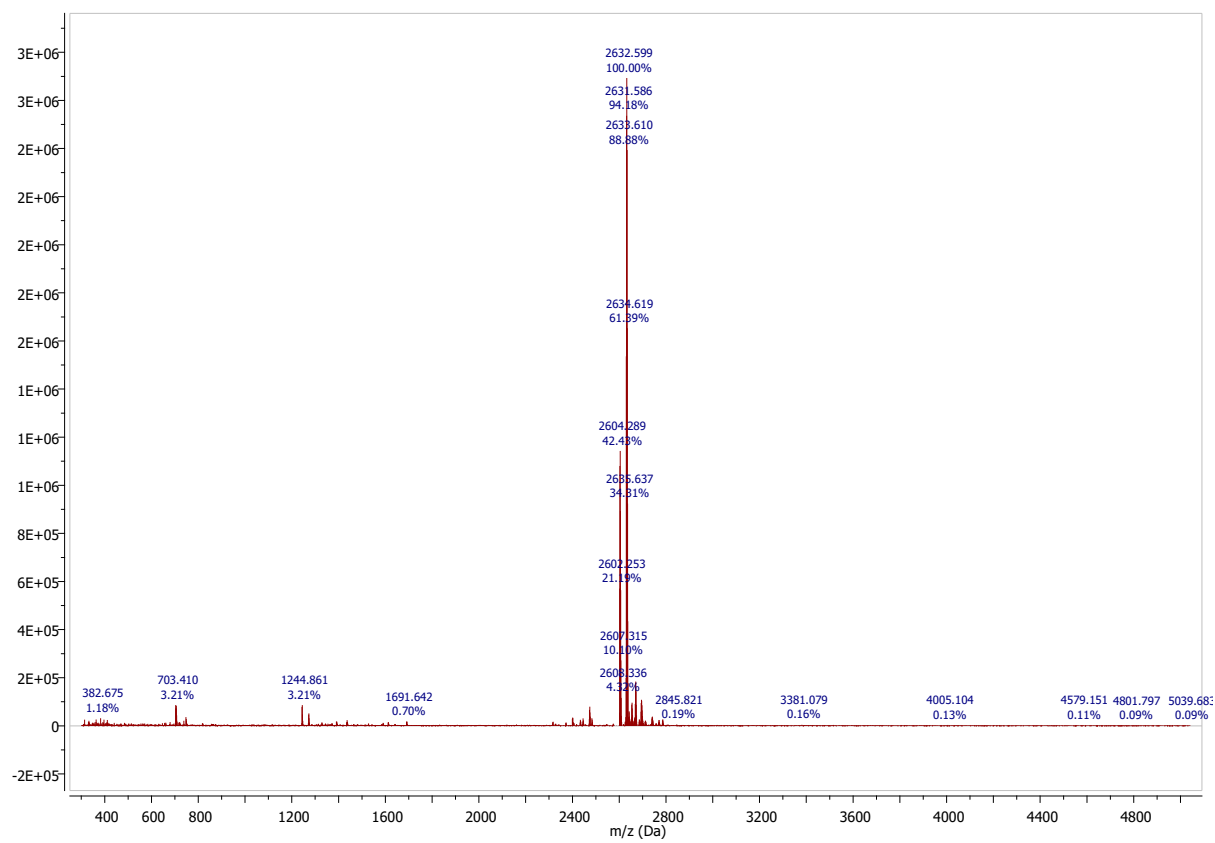

**Figure S13.** MALDI-TOF mass-spectrum of compound **5-Zn**.

Compound **6**.

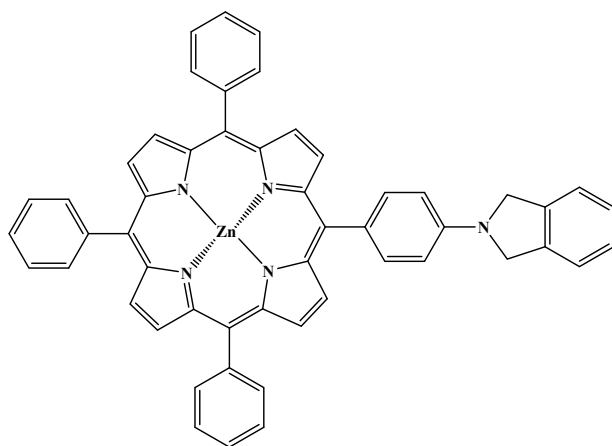

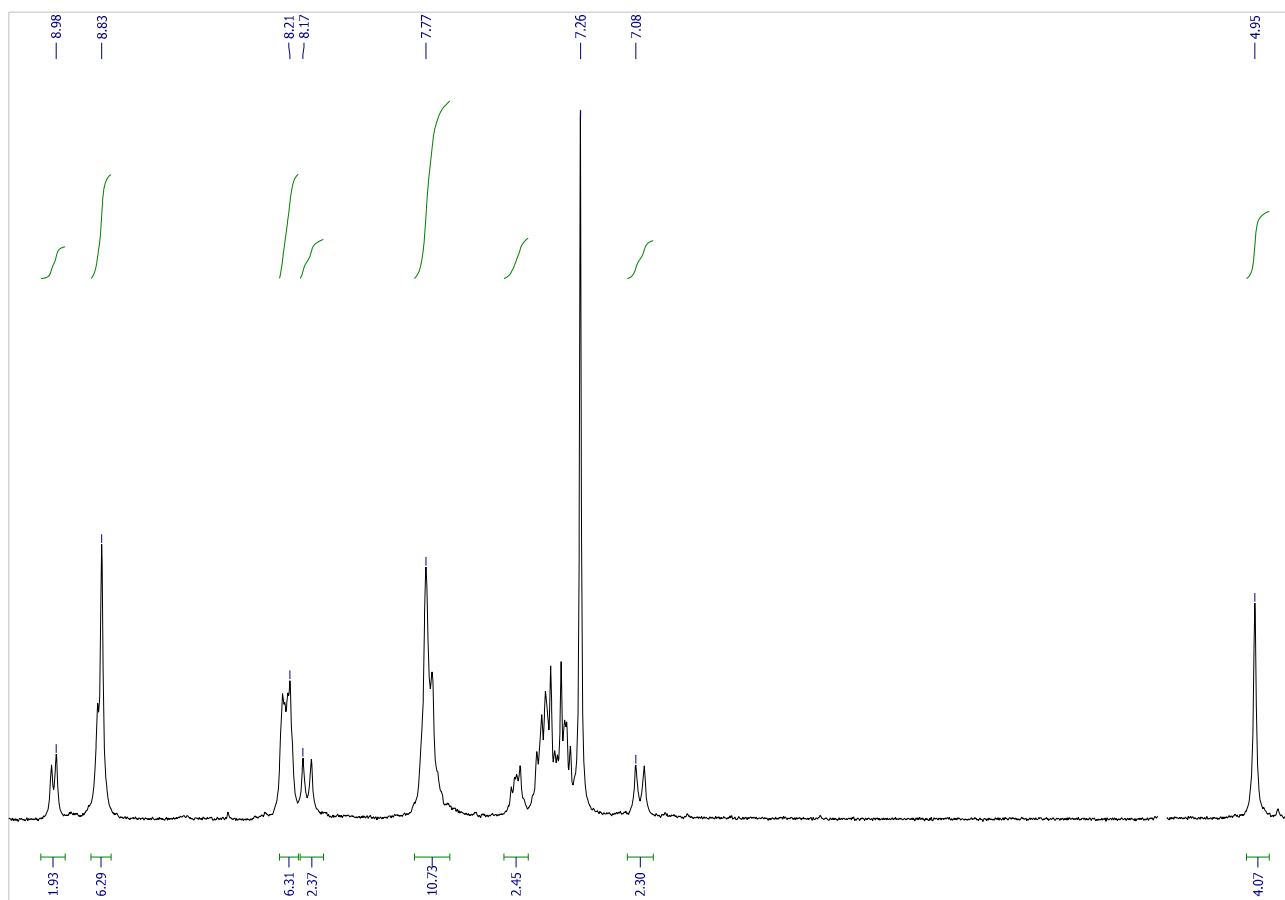

**Figure S14.**  $^1\text{H}$  NMR of compound **6** in  $\text{CDCl}_3$ .

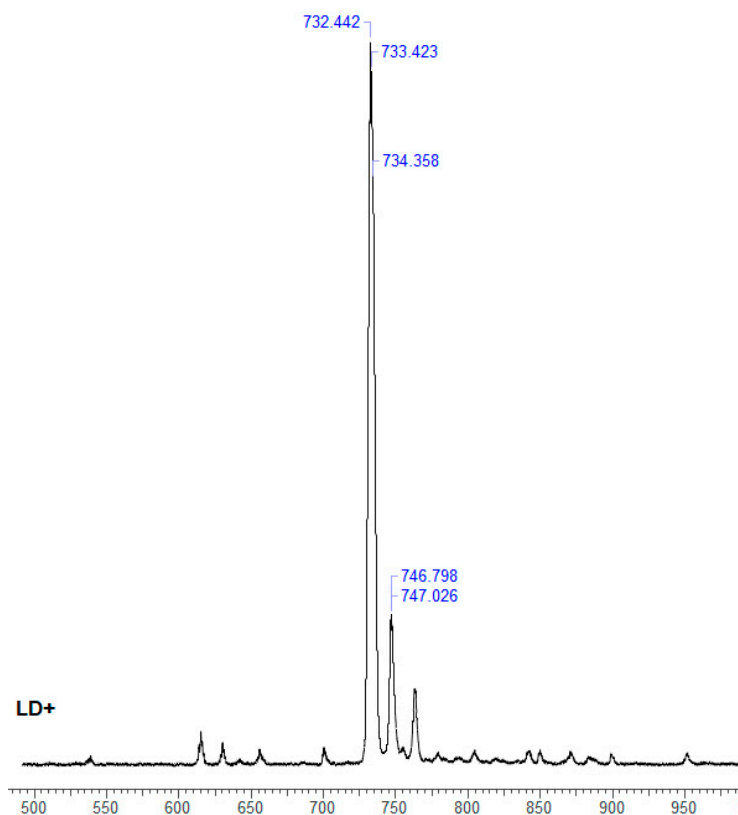

**Figure S15.** MALDI-TOF mass-spectrum of compound **6**.

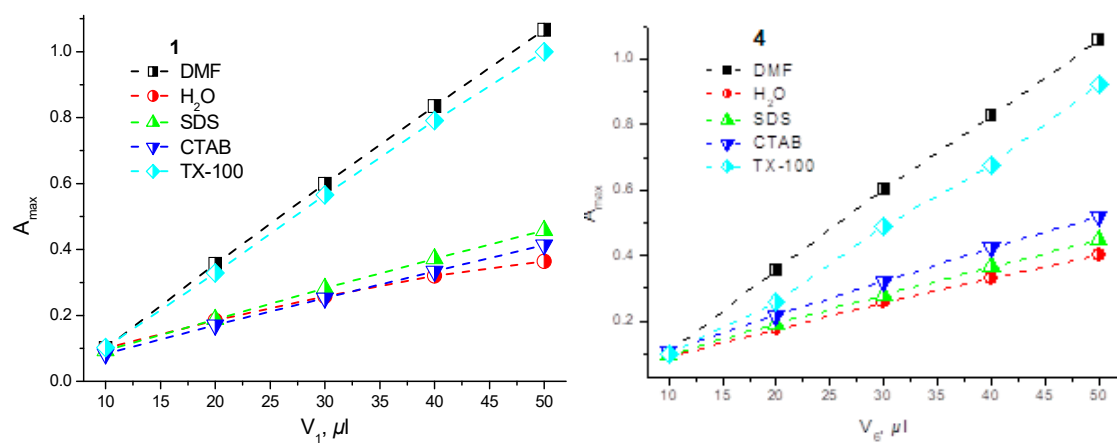

**Figure S16.** Concentration dependences of optical density for porphyrin **1** and dimer **4** in different media.

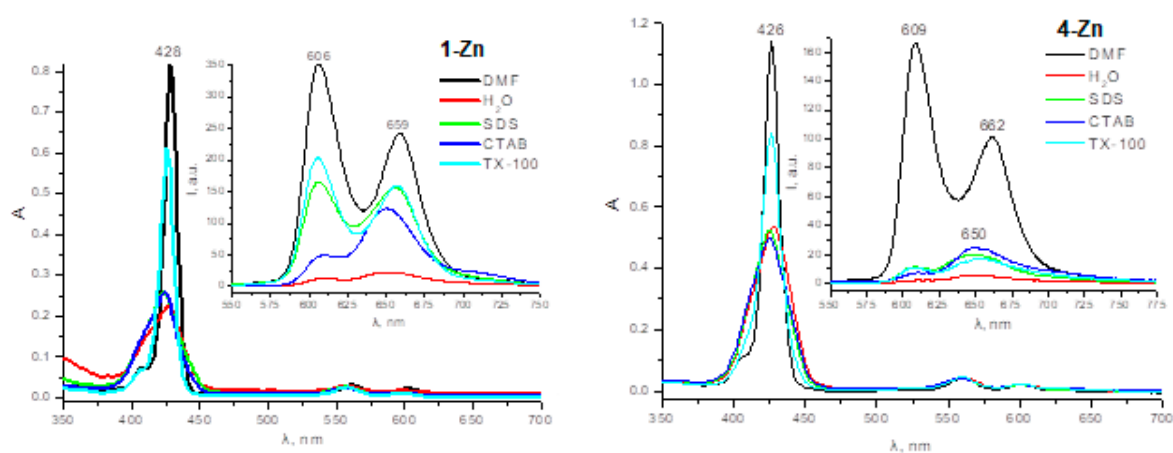

**Figure S17.** UV-Vis spectra of porphyrin **1-Zn** and dimer **4-Zn** in different media and their corresponding fluorescence spectra (insert).

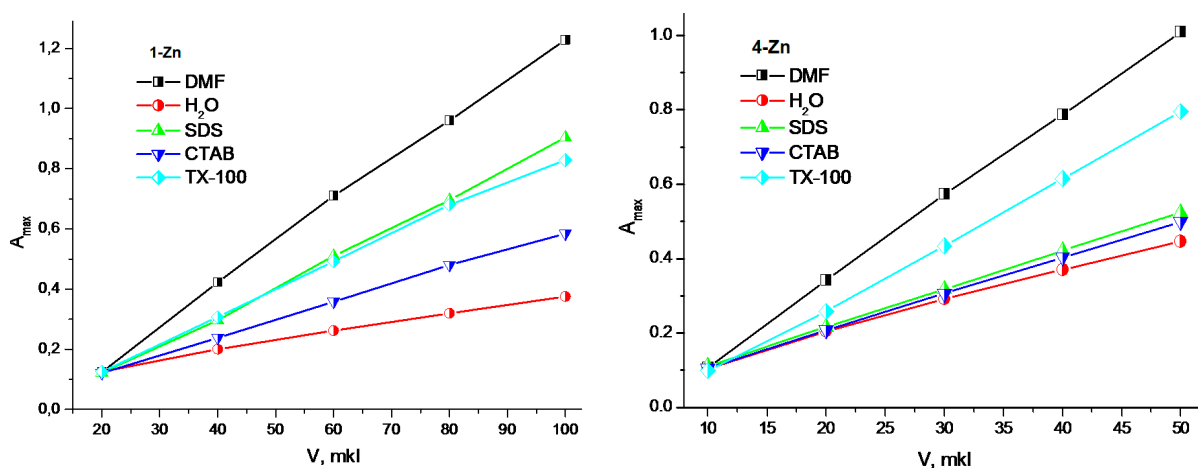

**Figure S18.** Concentration dependences of optical density for porphyrin **1-Zn** and dimer **4-Zn** in different media.

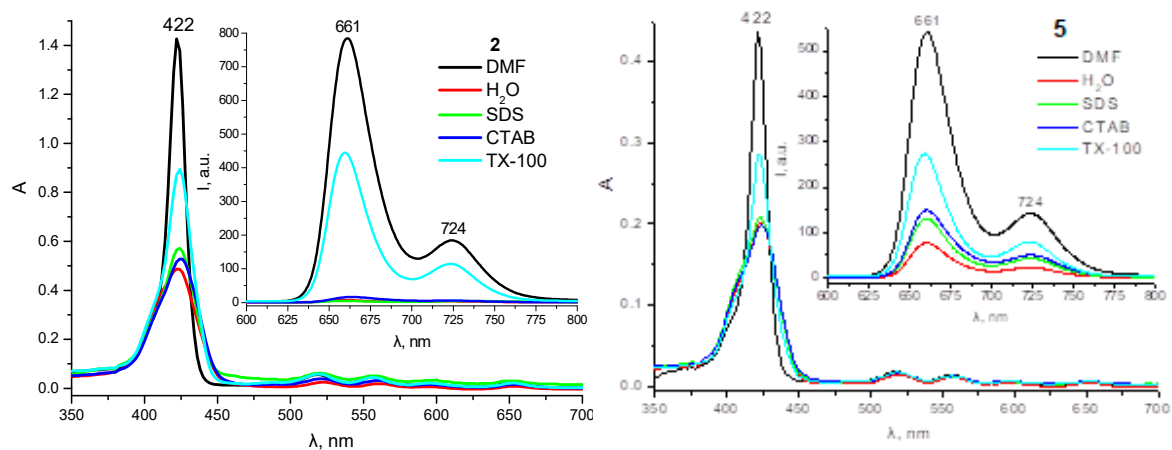

**Figure S19.** UV-Vis spectra of porphyrin **2** and dimer **5** in different media and their corresponding fluorescence spectra (insert)

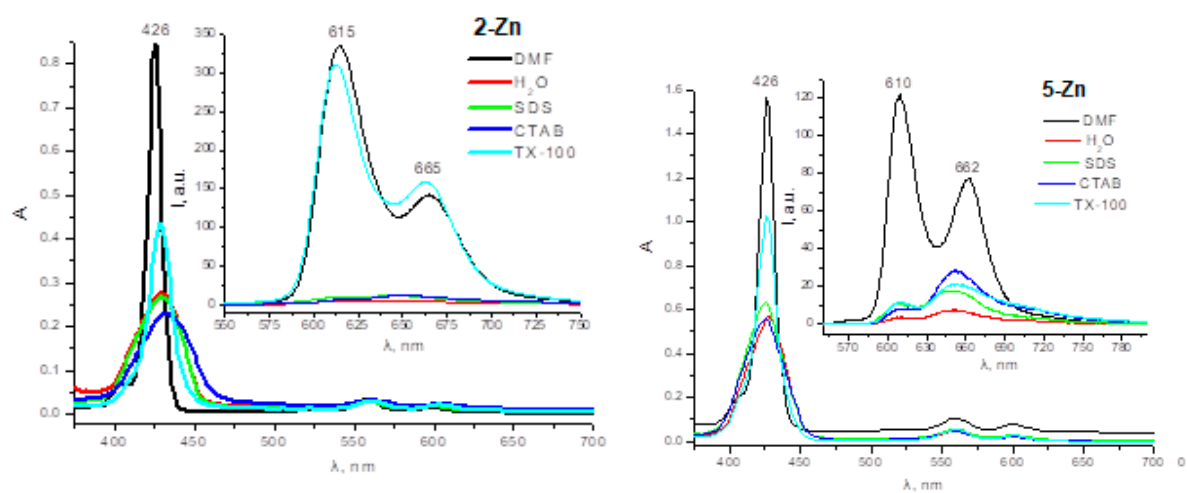

**Figure S20.** UV-Vis spectra for porphyrin **2-Zn** and dimer **5-Zn** in different media and their corresponding fluorescence spectra (insert).



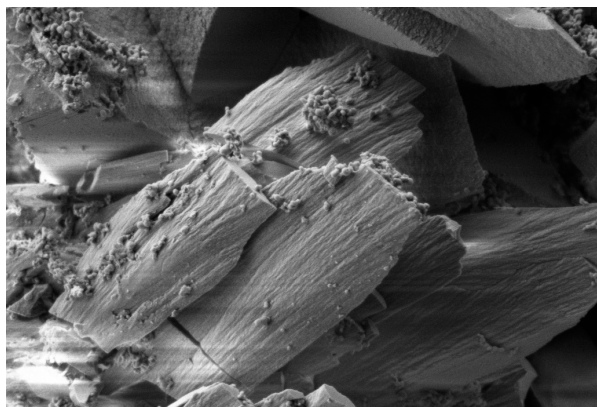

A)

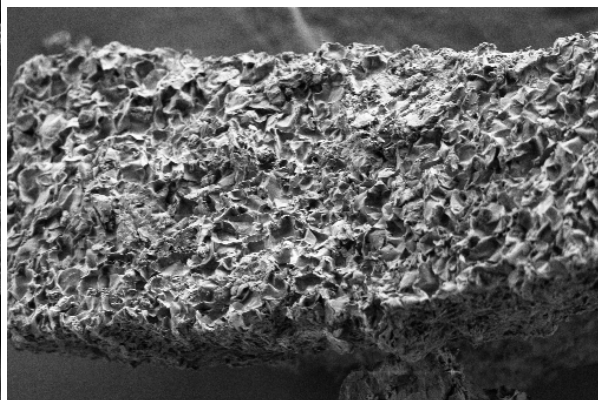

B)

Figure S21. SEM images A) porphyrin 4; B) porphyrin 5.

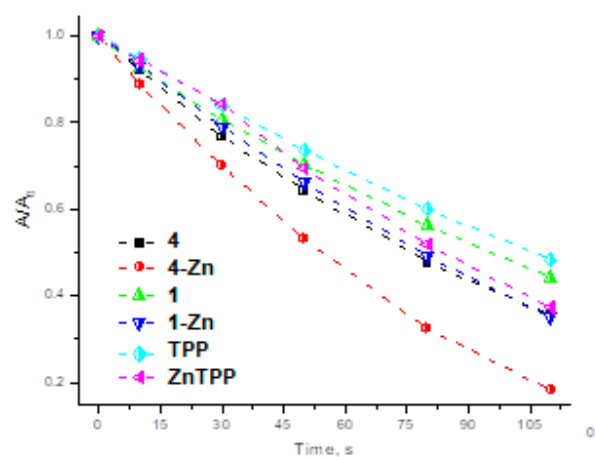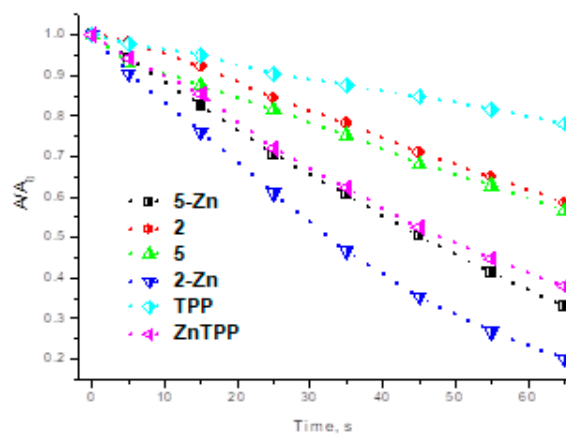

Figure S22. Kinetic curves of photosensitized oxidation of DPBF in DMF by singlet oxygen in the presence of compounds **1-(5-Zn)** ( $\lambda_{irr} > 500$  nm).
